# Supplementary material for: Insulin like growth factor binding protein 7 (IGFBP7) expression is linked to poor prognosis but may protect from bone disease in multiple myeloma
Source: Springer Nature journal article supplement (doi:10.1186/s13045-014-0105-1), 2015-02-07

**A**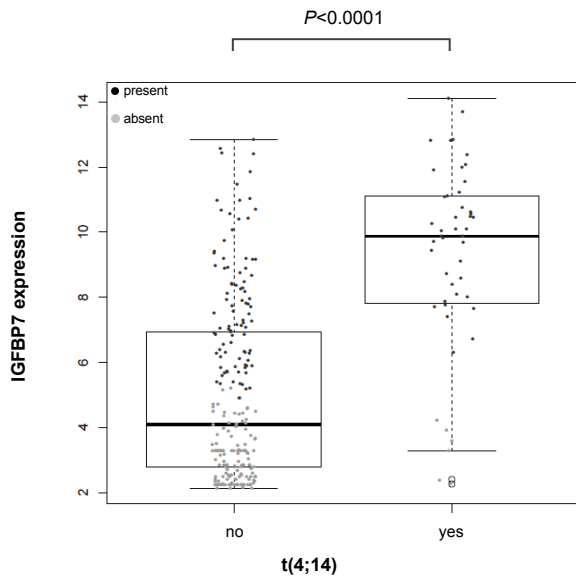**B**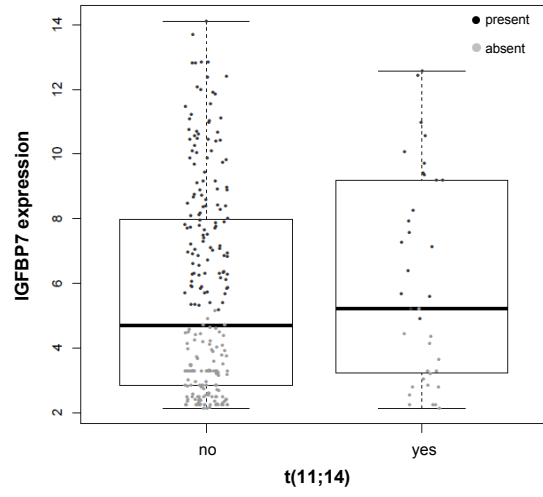**C**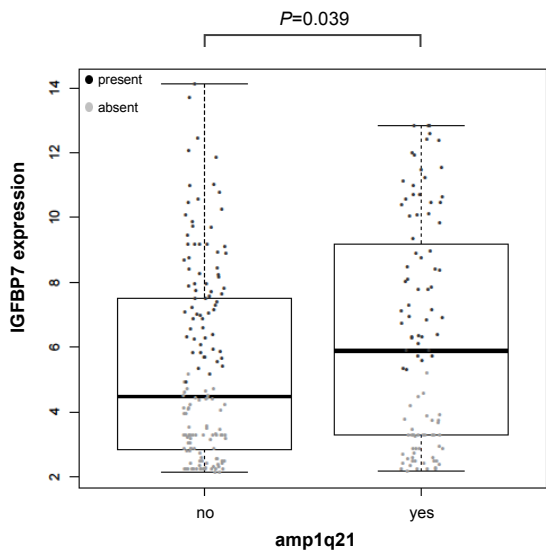**D**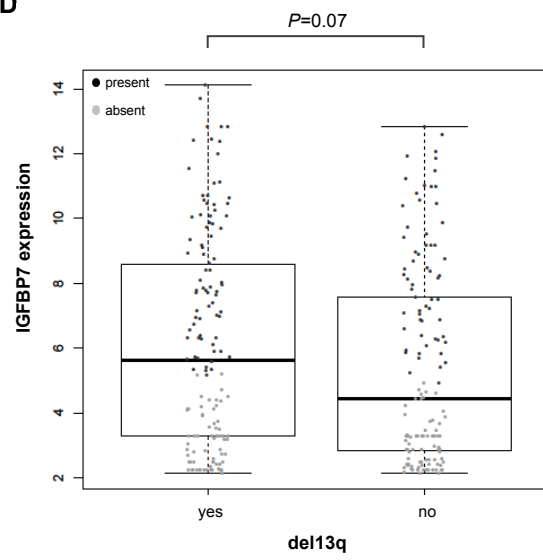**E**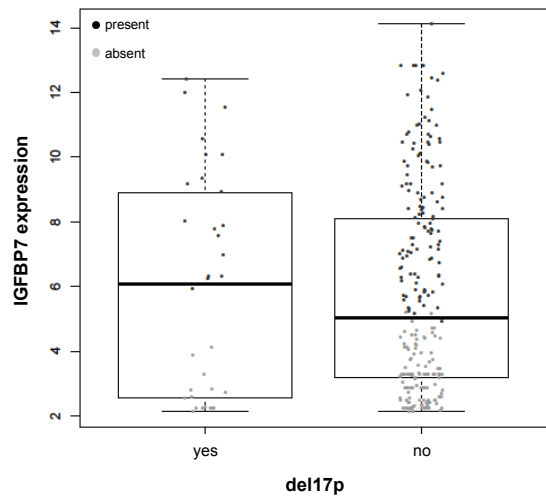

Supplement: MOESM4 [file 9777370]
